# Supplementary material
Source: publisher site journal article supplement (https://www.degruyterbrill.com/publication/isbn/9783899498547/downloadAsset/9783899498547_Inhaltsverzeichnis.pdf)
Supplement: Supplementary file 1 [file 9783899498547_Inhaltsverzeichnis.pdf]

# Inhaltsübersicht

## VIERTES BUCH

### Handelsgeschäfte

|                                                  |         |
|--------------------------------------------------|---------|
|                                                  | §§      |
| Zweiter Abschnitt. Handelskauf . . . . .         | 373–382 |
| Dritter Abschnitt. Kommissionsgeschäft . . . . . | 383–406 |
